# Supplementary material for: Bhageerath-H: A homology/ab initio hybrid server for predicting tertiary structures of monomeric soluble proteins
Source: PubMed Central journal article supplement (PMC4290660; doi:10.1186/1471-2105-15-s16-s7), 2014-12-08
Supplement: 1471-2105-15-S16-S7-S1.pdf [file 1471-2105-15-S16-S7-S1.pdf]

Additional File 1: C $\alpha$  RMSD and TM-Score of best *Bhageerath*-H prediction. Best refers to lowest C $\alpha$  RMSD predicted model in final five *Bhageerath*-H predictions.

| S.No. | TARGET | PDB IDs | C $\alpha$ RMSD (Å)<br>of best<br><i>Bhageerath</i> -H<br>prediction | Tm-score of<br>best<br><i>Bhageerath</i> -<br>H prediction |
|-------|--------|---------|----------------------------------------------------------------------|------------------------------------------------------------|
| 1     | T0644  | 4fr9    | 3.3                                                                  | 0.8                                                        |
| 2     | T0645  | 4f7a    | 3                                                                    | 0.9                                                        |
| 3     | T0649  | 4f54    | 13.8                                                                 | 0.4                                                        |
| 4     | T0650  | 4fmz    | 1.4                                                                  | 1                                                          |
| 5     | T0651  | 4f67    | 11.5                                                                 | 0.5                                                        |
| 6     | T0652  | 4hg0    | 8.4                                                                  | 0.6                                                        |
| 7     | T0653  | 4fs7    | 16.3                                                                 | 0.6                                                        |
| 8     | T0654  | 4fo5    | 3.6                                                                  | 0.8                                                        |
| 9     | T0655  | 2luz    | 3.1                                                                  | 1                                                          |
| 10    | T0657  | 2lul    | 3.8                                                                  | 0.8                                                        |
| 11    | T0658  | 4fj6    | 12                                                                   | 0.7                                                        |
| 12    | T0659  | 4esn    | 1.3                                                                  | 0.9                                                        |
| 13    | T0661  | 4fcz    | 3.3                                                                  | 0.8                                                        |
| 14    | T0662  | 2lte    | 2.7                                                                  | 0.8                                                        |
| 15    | T0663  | 4exr    | 10.8                                                                 | 0.5                                                        |
| 16    | T0664  | 4f53    | 2.8                                                                  | 0.9                                                        |
| 17    | T0666  | 3ux4    | 15.5                                                                 | 0.5                                                        |
| 18    | T0667  | 4fle    | 4.4                                                                  | 0.8                                                        |
| 19    | T0669  | 2ltl    | 3                                                                    | 0.8                                                        |
| 20    | T0671  | 4fd0    | 11                                                                   | 0.5                                                        |
| 21    | T0672  | 4f0j    | 5                                                                    | 0.8                                                        |
| 22    | T0673  | 4f98    | 11.2                                                                 | 0.4                                                        |
| 23    | T0674  | 4fdy    | 13.9                                                                 | 0.5                                                        |
| 24    | T0675  | 2lv2    | 5.0                                                                  | 0.5                                                        |
| 25    | T0676  | 4e6f    | 9.2                                                                  | 0.6                                                        |
| 26    | T0678  | 4epz    | 7.7                                                                  | 0.5                                                        |
| 27    | T0679  | 4h08    | 3.9                                                                  | 0.8                                                        |
| 28    | T0680  | 4fm3    | 4.9                                                                  | 0.6                                                        |
| 29    | T0681  | 4fxt    | 2.3                                                                  | 0.9                                                        |
| 30    | T0682  | 4jq6    | 3                                                                    | 0.9                                                        |

|    |       |      |      |     |
|----|-------|------|------|-----|
| 31 | T0683 | 4ezi | 2.7  | 0.9 |
| 32 | T0684 | 4gl6 | 19.1 | 0.3 |
| 33 | T0685 | 4fmt | 4.8  | 0.7 |
| 34 | T0686 | 4hqo | 7.8  | 0.6 |
| 35 | T0687 | 4hqf | 3.8  | 0.9 |
| 36 | T0688 | 4ezg | 3.6  | 0.9 |
| 37 | T0689 | 4fvs | 1.6  | 0.9 |
| 38 | T0690 | 4gt6 | 11.9 | 0.5 |
| 39 | T0691 | 4gzv | 14   | 0.5 |
| 40 | T0692 | 4h7n | 2.7  | 0.9 |
| 41 | T0699 | 4kt7 | 2.8  | 0.9 |
| 42 | T0700 | 4hfx | 3.7  | 0.5 |
| 43 | T0703 | 4hes | 3.9  | 0.9 |
| 44 | T0704 | 4hg2 | 4.3  | 0.8 |
| 45 | T0705 | 4ftd | 27.9 | 0.5 |
| 46 | T0707 | 4h41 | 9.9  | 0.7 |
| 47 | T0708 | 4h17 | 1    | 1   |
| 48 | T0712 | 4gbs | 2.1  | 0.9 |
| 49 | T0713 | 4h09 | 6.6  | 0.6 |
| 50 | T0714 | 2lvc | 1.6  | 0.9 |
| 51 | T0715 | 4c3s | 4.8  | 0.9 |
| 52 | T0716 | 2ly9 | 3    | 0.7 |
| 53 | T0717 | 4h0a | 15.1 | 0.5 |
| 54 | T0719 | 4ak1 | 20.3 | 0.3 |
| 55 | T0720 | 4ic1 | 16.1 | 0.6 |
| 56 | T0721 | 4fk1 | 3.1  | 0.9 |
| 57 | T0724 | 4fmr | 8.2  | 0.4 |
| 58 | T0726 | 4fgm | 10.1 | 0.6 |
| 59 | T0731 | 2lz1 | 9.4  | 0.5 |
| 60 | T0733 | 4gqa | 2.6  | 0.9 |
| 61 | T0735 | 4g2a | 17   | 0.4 |
| 62 | T0736 | 4l8p | 4.3  | 0.8 |
| 63 | T0737 | 3td7 | 13.3 | 0.6 |
| 64 | T0738 | 4is2 | 2    | 0.9 |
| 65 | T0742 | 4ghb | 16.2 | 0.4 |
| 66 | T0743 | 4hyz | 4.9  | 0.6 |
| 67 | T0744 | 2ymv | 11.1 | 0.5 |

|    |       |      |      |     |
|----|-------|------|------|-----|
| 68 | T0746 | 4gpv | 7.9  | 0.7 |
| 69 | T0747 | 4g5a | 4.1  | 0.9 |
| 70 | T0749 | 4gl3 | 1.9  | 0.9 |
| 71 | T0752 | 4gb5 | 3.6  | 0.9 |
| 72 | T0753 | 4goq | 2.6  | 0.8 |
| 73 | T0755 | 4h1x | 5    | 0.8 |
| 74 | T0756 | 4g6q | 10.5 | 0.5 |
| 75 | T0757 | 4gak | 3    | 0.9 |
