# Supplementary material for: Bhageerath-H: A homology/ab initio hybrid server for predicting tertiary structures of monomeric soluble proteins
Source: PubMed Central journal article supplement (PMC4290660; doi:10.1186/1471-2105-15-s16-s7), 2014-12-08
Supplement: 1471-2105-15-S16-S7-S3.pdf [file 1471-2105-15-S16-S7-S3.pdf]

Additional File 3: Molprobit score of the best *Bhageerath*-H prediction

| <b>S.No.</b> | <b>Target</b> | <b>Molprobit score of best <i>Bhageerath</i>-H prediction</b> |
|--------------|---------------|---------------------------------------------------------------|
| 1            | T0644         | 1.8                                                           |
| 2            | T0645         | 1.54                                                          |
| 3            | T0649         | 2.44                                                          |
| 4            | T0650         | 1.31                                                          |
| 5            | T0651         | 3.59                                                          |
| 6            | T0652         | 1.25                                                          |
| 7            | T0653         | 1.82                                                          |
| 8            | T0654         | 1.75                                                          |
| 9            | T0655         | 1.61                                                          |
| 10           | T0657         | 1.46                                                          |
| 11           | T0658         | 2.05                                                          |
| 12           | T0659         | 1.11                                                          |
| 13           | T0661         | 1.07                                                          |
| 14           | T0662         | 0.93                                                          |
| 15           | T0663         | 2.07                                                          |
| 16           | T0664         | 1.64                                                          |
| 17           | T0666         | 1.7                                                           |
| 18           | T0667         | 1.5                                                           |
| 19           | T0669         | 1.38                                                          |
| 20           | T0671         | 0.85                                                          |
| 21           | T0672         | 1.82                                                          |
| 22           | T0673         | 1.44                                                          |
| 23           | T0674         | 1.68                                                          |
| 24           | T0675         | 1.32                                                          |
| 25           | T0676         | 2.2                                                           |
| 26           | T0678         | 1.39                                                          |
| 27           | T0679         | 2.52                                                          |
| 28           | T0680         | 1.59                                                          |
| 29           | T0681         | 1.79                                                          |
| 30           | T0682         | 1.61                                                          |
| 31           | T0683         | 1.65                                                          |
| 32           | T0684         | 1.91                                                          |
| 33           | T0685         | 2.51                                                          |
| 34           | T0686         | 2.27                                                          |
| 35           | T0687         | 1.97                                                          |
| 36           | T0688         | 1.22                                                          |
| 37           | T0689         | 2.53                                                          |

|                |       |             |
|----------------|-------|-------------|
| 38             | T0690 | 2.6         |
| 39             | T0691 | 1.73        |
| 40             | T0692 | 1.56        |
| 41             | T0699 | 1.59        |
| 42             | T0700 | 1.08        |
| 43             | T0703 | 1.67        |
| 44             | T0704 | 2.79        |
| 45             | T0705 | 2.56        |
| 46             | T0707 | 2.66        |
| 47             | T0708 | 1.2         |
| 48             | T0712 | 1.5         |
| 49             | T0713 | 1           |
| 50             | T0714 | 1.03        |
| 51             | T0715 | 1.83        |
| 52             | T0716 | 1.53        |
| 53             | T0717 | 2.93        |
| 54             | T0719 | 2.74        |
| 55             | T0720 | 2.11        |
| 56             | T0721 | 1           |
| 57             | T0724 | 2.98        |
| 58             | T0726 | 2.27        |
| 59             | T0731 | 3.12        |
| 60             | T0733 | 1.32        |
| 61             | T0735 | 2.49        |
| 62             | T0736 | 1.65        |
| 63             | T0737 | 1.95        |
| 64             | T0738 | 0.96        |
| 65             | T0742 | 2.53        |
| 66             | T0743 | 2.36        |
| 67             | T0744 | 2.81        |
| 68             | T0746 | 2.05        |
| 69             | T0747 | 0.85        |
| 70             | T0749 | 1.25        |
| 71             | T0752 | 2.12        |
| 72             | T0753 | 1.34        |
| 73             | T0755 | 3.71        |
| 74             | T0756 | 1.85        |
| 75             | T0757 | 1.31        |
| <b>Average</b> |       | <b>1.84</b> |
